# Supplementary material for: GSEA-assisted gene signatures valid for combinations of prognostic markers in PCNSL
Source: PubMed Central journal article supplement (PMC7242340; doi:10.1038/s41598-020-65463-6), 2020-05-21
Supplement: 41598_2020_65463_MOESM1_ESM.pdf [file 41598_2020_65463_MOESM1_ESM.pdf]

# GSEA-assisted gene signatures valid for combinations of prognostic markers in PCNSL

Yasuo Takashima<sup>1,2</sup>, Momoko Hamano<sup>3</sup>, Junya Fukai<sup>4</sup>, Yasuo Iwadate<sup>5</sup>, Koji Kajiwara<sup>6</sup>, Tsutomu Kobayashi<sup>7</sup>, Hiroaki Hondoh<sup>7</sup>, and Ryuya Yamanaka<sup>1,2,\*</sup>

<sup>1</sup>Osaka Iseikai Clinic for Cancer Therapy, Iseikai Holonics Group, Osaka, Japan

<sup>2</sup>Laboratory of Molecular Target Therapy for Cancer, Graduate School of Medical Science, Kyoto Prefectural University of Medicine, Kyoto, Japan

<sup>3</sup>Department of Bioscience and Bioinformatics, Faculty of Computer Science and Systems Engineering, Kyushu Institute of Technology, Iizuka, Fukuoka, Japan

<sup>4</sup>Department of Neurological Surgery, Wakayama Medical University School of Medicine, Wakayama, Japan

<sup>5</sup>Department of Neurosurgery, Graduate School of Medical Sciences, Chiba University, Chiba, Japan

<sup>6</sup>Department of Neurosurgery, Graduate School of Medical Sciences, Yamaguchi University, Ube, Yamaguchi, Japan

<sup>7</sup>Department of Neurosurgery, Toyama Prefectural Central Hospital, Toyama, Japan

\*To whom correspondence should be addressed: ryaman@koto.kpu-m.ac.jp

## List of Supplementary Tables

**Suppl. Table S1.** Summary of GSEA results of the MTX-resistant HKBML and TK cells.

**Suppl. Table S2.** List of differentially expressed genes with enrichment scores in GSEA.

**Suppl. Table S3.** Increased expression of MTX-resistance genes in PCNSL with poor prognoses.

**Suppl. Table S4.** List of gene ontology terms of differentially expressed genes in the MTX-resistant HKBML and TK cells.

**Suppl. Table S5.** Summary of functional GSEA for the MTX-resistant HKBML and TK cells.

**Suppl. Table S6.** Summary of the protein-protein interaction analysis.

**Suppl. Table S7.** Characteristics of the PCNSL patients in the study.

**Suppl. Table S8.** Characteristics of PCNSL cell lines HKBML and TK.

## Supplementary Figure Legends

**Suppl. Fig. S1.** Precise expression of GSEA-associated marker candidates in PCNSL samples divided by prognoses in box-whisker plots. (a) *FOXD2-AS1*, (b) *MYLK-AS1*, (c) *ZNF169*, (d) *DHDH*, and (e) *IMPA2* as secondary gene marker candidates for TK-type MTX-resistant PCNSL. FPKM; fragments per kilobase of exon model per million reads mapped.

**Suppl. Fig. S2.** Gene expression profiling of GSEA-assisted marker candidates in PCNSL samples divided by hierarchical clustering method using the MTX-resistant HKBML-promoted genes. The groups were divided in Cluster 1 and the combined clusters 2 and 3. The results of gene expression patterns in PCNSL were displayed as box-whisker plots. **(a)** GSEA-assisted upregulated genes in the MTX-resistant HKBML. **(b)** GSEA-assisted downregulated genes in the MTX-resistant HKBML. FPKM; fragments per kilobase of exon model per million reads mapped. Representative genes upregulated in Cluster 1 than Clusters 2 and 3 ( $p < 0.05$ ).

**Suppl. Fig. S3.** Gene expression profiling of GSEA-assisted marker candidates in PCNSL samples divided by hierarchical clustering method using the MTX-resistant TK-promoted genes. The groups were divided in Cluster 1 and the combined clusters 2 and 3. The results of gene expression patterns in PCNSL were displayed as box-whisker plots. **(a)** GSEA-assisted upregulated genes in the MTX-resistant TK. **(b)** GSEA-assisted downregulated genes in the MTX-resistant TK. FPKM; fragments per kilobase of exon model per million reads mapped. Representative genes upregulated in Cluster 1 than Clusters 2 and 3 ( $p < 0.05$ ).

**Suppl. Fig. S4.** Functional gene set enrichment analysis of the differentially expressed genes in MTX-resistant PCNSL-derived cells in molecular pathways. **(a-d)** GSEA of DEG for HKBML-MTX compared with HKBML in molecular pathways. **(a)** Formation of the ternary complex. **(b)** Cancer module 29. **(c)** Thymocyte vs naïve CD4 T cell. **(d)** Neutrophil vs B cell. **(e-g)** GSEA of DEG for TK-MTX compared with TK in molecular pathways. **(e)** Cancer module 29. **(f)** Thymocyte vs naïve CD4 T cell. **(g)** Th1 vs Th17.

**Suppl. Fig. S5.** Protein-protein interaction (PPI) networks in PCNSL with poor prognoses. The networks were estimated by the MCODE with the STRING. PPI networks based on the upregulated genes in the PCNSL with poor prognoses, compared with good prognoses.

Suppl. Table S1. Summary of GSEA results of the MTX-resistant HKBML and TK cells.

|               | SIZE | ES         | NES       | NOM p-val  | FDR q-val | FWER p-val | RANK AT MAX | LEADING EDGE                   |
|---------------|------|------------|-----------|------------|-----------|------------|-------------|--------------------------------|
| HKMBLMTX_UP   | 190  | 0.4794845  | 0.9191075 | 0.6199616  | 0.7933504 | 0.631      | 10075       | tags=67%, list=32%, signal=99% |
| HKMBLMTX_DOWN | 149  | 0.3241223  | 0.9640492 | 0.5156576  | 1         | 0.585      | 7631        | tags=38%, list=24%, signal=50% |
| TKMTX_UP      | 188  | 0.53476614 | 1.0430157 | 0.5122873  | 1         | 0.521      | 8775        | tags=63%, list=28%, signal=87% |
| TKMTX_DOWN    | 160  | 0.26003    | 0.774868  | 0.79710144 | 0.7695585 | 0.781      | 3330        | tags=20%, list=11%, signal=22% |

Note: ES; enrichment score, NES; normalized enrichment score. NOM; nominal, FDR; false-discovery rate, FWER; familywise error rate.

Suppl. Table S2. List of differentially expressed genes with enrichment scores in GSEA.

| GENE SYMBOL            | GENE TITLE                                                                                          | RANK METRIC SCORE | RUNNING ES   |
|------------------------|-----------------------------------------------------------------------------------------------------|-------------------|--------------|
| <b>(HKMBLMTX_UP)</b>   |                                                                                                     |                   |              |
| NDUFA1                 | NADH dehydrogenase (ubiquinone) 1 alpha subcomplex, 1, 7.5kDa                                       | 0.397140563       | -0.026528558 |
| TMSB10                 | thymosin, beta 10                                                                                   | 0.388239563       | -0.018115608 |
| SNRPB                  | small nuclear ribonucleoprotein polypeptides B and B1                                               | 0.386943698       | -0.007055623 |
| PTPRCAP                | protein tyrosine phosphatase, receptor type, C-associated protein                                   | 0.340762347       | 1.51E-04     |
| CKS2                   | CDC28 protein kinase regulatory subunit 2                                                           | 0.313993692       | 0.05327289   |
| MIF                    | macrophage migration inhibitory factor (glycosylation-inhibiting factor)                            | 0.301482141       | 0.09182375   |
| HMG2                   | high-mobility group nucleosomal binding domain 2                                                    | 0.293043077       | 0.09464819   |
| SLC25A5                | solute carrier family 25 (mitochondrial carrier; adenine nucleotide translocator), member 5         | 0.290103614       | 0.1009331    |
| CD79B                  | CD79b molecule, immunoglobulin-associated beta                                                      | 0.284650356       | 0.113516934  |
| NDUFA11                | NADH dehydrogenase (ubiquinone) 1 alpha subcomplex, 11, 14.7kDa                                     | 0.282275319       | 0.13750684   |
| COX8A                  | cytochrome c oxidase subunit 8A (ubiquitous)                                                        | 0.2578623         | 0.17503057   |
| SEC61B                 | Sec61 beta subunit                                                                                  | 0.252367914       | 0.17725474   |
| UBL5                   | ubiquitin-like 5                                                                                    | 0.240168452       | 0.20206478   |
| OAZ1                   | ornithine decarboxylase antizyme 1                                                                  | 0.2371362         | 0.20612736   |
| EDF1                   | endothelial differentiation-related factor 1                                                        | 0.23236765        | 0.23618126   |
| COX7B                  | cytochrome c oxidase subunit VIIb                                                                   | 0.229195774       | 0.24012971   |
| TAGLN2                 | transgelin 2                                                                                        | 0.220478266       | 0.24467061   |
| ACTG1                  | actin, gamma 1                                                                                      | 0.220252126       | 0.25109693   |
| COX4I                  | cytochrome c oxidase subunit IV isoform 1                                                           | 0.21883817        | 0.2557531    |
| GSTP1                  | glutathione S-transferase pi                                                                        | 0.21809876        | 0.26173      |
| <b>(HKMBLMTX_DOWN)</b> |                                                                                                     |                   |              |
| LRP5L                  | low density lipoprotein receptor-related protein 5-like                                             | 0.612622857       | 0.018523918  |
| FOXO2-AS1              |                                                                                                     | 0.529060304       | 0.029978218  |
| INE1                   | inactivation escape 1                                                                               | 0.492034793       | 0.042052694  |
| RASGRP2                | RAS guanyl releasing protein 2 (calcium and DAG-regulated)                                          | 0.479510814       | 0.056063123  |
| CSAD                   | cysteine sulfinic acid decarboxylase                                                                | 0.447802305       | 0.06477462   |
| CLCN2                  | chloride channel 2                                                                                  | 0.446014792       | 0.07958963   |
| BHLHA15                |                                                                                                     | 0.418974578       | 0.08629462   |
| NRL                    | neural retina leucine zipper                                                                        | 0.413132042       | 0.098293915  |
| ULK1                   | unc-51-like kinase 1 (C. elegans)                                                                   | 0.390423298       | 0.10351291   |
| TOP3B                  | topoisomerase (DNA) III beta                                                                        | 0.390006036       | 0.11670284   |
| SLC25A29               | solute carrier family 25, member 29                                                                 | 0.379314959       | 0.124513     |
| ZNF169                 | zinc finger protein 169                                                                             | 0.374962091       | 0.13524082   |
| DHDH                   | dihydrodiol dehydrogenase (dimeric)                                                                 | 0.368844539       | 0.1446099    |
| ELF3                   | E74-like factor 3 (ets domain transcription factor, epithelial-specific)                            | 0.36605081        | 0.1554806    |
| INSL3                  | insulin-like 3 (Leydig cell)                                                                        | 0.363168061       | 0.16634868   |
| FAM71F2                |                                                                                                     | 0.35780412        | 0.17559627   |
| MTMR8                  | myotubularin related protein 8                                                                      | 0.345437855       | 0.18010959   |
| ZFP92                  | zinc finger protein 92 homolog (mouse)                                                              | 0.342328489       | 0.19010636   |
| TMPRSS13               | transmembrane protease, serine 13                                                                   | 0.330932826       | 0.19482706   |
| HSD3B7                 | hydroxy-delta-5-steroid dehydrogenase, 3 beta- and steroid delta-isomerase 7                        | 0.329542547       | 0.2054732    |
| <b>(TKMTX_UP)</b>      |                                                                                                     |                   |              |
| FABP5                  | fatty acid binding protein 5 (psoriasis-associated)                                                 | 0.613543928       | 0.016300282  |
| CD70                   |                                                                                                     | 0.402614355       | -0.005925367 |
| TMSB10                 | thymosin, beta 10                                                                                   | 0.388239563       | 7.06E-04     |
| EBI3                   | Epstein-Barr virus induced gene 3                                                                   | 0.378264457       | 0.007321355  |
| CYBA                   | cytochrome b-245, alpha polypeptide                                                                 | 0.377113014       | 0.01841111   |
| IFI30                  | interferon, gamma-inducible protein 30                                                              | 0.34098345        | 0.030232115  |
| LGALS1                 | lectin, galactoside-binding, soluble, 1 (galectin 1)                                                | 0.332313716       | 0.055619605  |
| FTH1                   | ferritin, heavy polypeptide 1                                                                       | 0.320709407       | 0.097788356  |
| MIF                    | macrophage migration inhibitory factor (glycosylation-inhibiting factor)                            | 0.301482141       | 0.13193183   |
| COX5B                  | cytochrome c oxidase subunit Vb                                                                     | 0.300124079       | 0.13965584   |
| SLC25A5                | solute carrier family 25 (mitochondrial carrier; adenine nucleotide translocator), member 5         | 0.290103614       | 0.14122255   |
| ATP1A1                 | ATPase, Na <sup>+</sup> /K <sup>+</sup> transporting, alpha 1 polypeptide                           | 0.259243309       | 0.19146328   |
| COX8A                  | cytochrome c oxidase subunit 8A (ubiquitous)                                                        | 0.2578623         | 0.2057329    |
| SEC61B                 | Sec61 beta subunit                                                                                  | 0.252367914       | 0.20794243   |
| CALR                   | calreticulin                                                                                        | 0.238445997       | 0.2309013    |
| OAZ1                   | ornithine decarboxylase antizyme 1                                                                  | 0.2371362         | 0.23667696   |
| PFDN5                  | prefoldin subunit 5                                                                                 | 0.235297084       | 0.24172507   |
| EDF1                   | endothelial differentiation-related factor 1                                                        | 0.23236765        | 0.27385274   |
| PSMB4                  | proteasome (prosome, macropain) subunit, beta type, 4                                               | 0.231269568       | 0.28002554   |
| COX7B                  | cytochrome c oxidase subunit VIIb                                                                   | 0.229195774       | 0.28485605   |
| <b>(TKMTX_DOWN)</b>    |                                                                                                     |                   |              |
| RUNX1                  | runt-related transcription factor 1 (acute myeloid leukemia 1; aml1 oncogene)                       | 0.624679029       | 0.017253693  |
| PRPF40B                | PRP40 pre-mRNA processing factor 40 homolog B (S. cerevisiae)                                       | 0.525474489       | 0.026106618  |
| HOXB9                  | homeobox B9                                                                                         | 0.45934996        | 0.02965762   |
| P2RX1                  | purinergic receptor P2X, ligand-gated ion channel, 1                                                | 0.446724504       | 0.0406468    |
| MMP19                  | matrix metalloproteinase 19                                                                         | 0.440925479       | 0.05302247   |
| TRIM66                 | tripartite motif-containing 66                                                                      | 0.438422859       | 0.06580011   |
| IMPA2                  | inositol(myo)-1(or 4)-monophosphatase 2                                                             | 0.435186207       | 0.078190185  |
| PRG2                   | proteoglycan 2, bone marrow (natural killer cell activator, eosinophil granule major basic protein) | 0.428551376       | 0.08941673   |
| MYLK-AS1               |                                                                                                     | 0.393846393       | 0.090017475  |
| SMG1P1                 |                                                                                                     | 0.389736831       | 0.10036442   |
| FAM193B                |                                                                                                     | 0.371844381       | 0.10325697   |
| PSORS1C3               | psoriasis susceptibility 1 candidate 3                                                              | 0.369618744       | 0.113365814  |
| KCP                    |                                                                                                     | 0.366103142       | 0.1226631    |
| CRIP3                  | cysteine-rich protein 3                                                                             | 0.361417443       | 0.13156003   |
| FBXO43                 | F-box protein 43                                                                                    | 0.356241137       | 0.13959408   |
| DOCK6                  | dedicator of cytokinesis 6                                                                          | 0.348202765       | 0.14536683   |
| TMEM184A               |                                                                                                     | 0.345112145       | 0.15427125   |
| MASP2                  | mannan-binding lectin serine peptidase 2                                                            | 0.344212115       | 0.16439399   |
| STAG3L1                |                                                                                                     | 0.341902554       | 0.17387024   |
| ZNF514                 | zinc finger protein 514                                                                             | 0.339674294       | 0.18305399   |

Suppl. Table S3. Increased expression of MTX-resistance genes in PCNSL with poor prognoses.

| GENE      | (HKBMLMTX_UP)     |                      | (TKMTX_UP) |           | (HKBMLMTX_DOWN) |           | (TKMTX_DOWN) |           |
|-----------|-------------------|----------------------|------------|-----------|-----------------|-----------|--------------|-----------|
|           | Fold <sup>1</sup> | p-value <sup>2</sup> | Fold       | p-value   | Fold            | p-value   | Fold         | p-value   |
| ARPC3     | 3.5641            | 2.148E-06            |            |           |                 |           |              |           |
| CD37      | 3.2404            | 2.596E-06            |            |           |                 |           |              |           |
| CD79A     | 3.7714            | 7.647E-05            |            |           |                 |           |              |           |
| CHCHD2    | 3.2175            | 1.175E-09            | 3.2175     | 1.175E-09 |                 |           |              |           |
| CKS2      | 5.9622            | 3.700E-10            |            |           |                 |           |              |           |
| CORO1A    | 3.0933            | 7.271E-07            |            |           |                 |           |              |           |
| COX411    | 4.0134            | 3.471E-08            | 4.0134     | 3.471E-08 |                 |           |              |           |
| COX6A1    | 4.1365            | 1.073E-12            | 4.1365     | 1.073E-12 |                 |           |              |           |
| COX7B     | 3.8440            | 9.332E-07            | 3.8440     | 9.332E-07 |                 |           |              |           |
| EIF5A     | 3.3668            | 8.085E-11            | 3.3668     | 8.085E-11 |                 |           |              |           |
| ERH       | 3.8010            | 1.206E-05            | 3.8010     | 1.206E-05 |                 |           |              |           |
| GAS5      | 6.2976            | 2.393E-04            | 6.2976     | 2.393E-04 |                 |           |              |           |
| H2AFZ     | 3.3518            | 1.325E-04            | 3.3518     | 1.325E-04 |                 |           |              |           |
| HINT1     | 4.3028            | 1.721E-11            | 4.3028     | 1.721E-11 |                 |           |              |           |
| LDHB      | 5.2468            | 2.754E-03            | 5.2468     | 2.754E-03 |                 |           |              |           |
| MIF       | 3.8302            | 2.649E-10            | 3.8302     | 2.649E-10 |                 |           |              |           |
| MYL6      | 3.2504            | 4.291E-09            | 3.2504     | 4.291E-09 |                 |           |              |           |
| NACA      | 3.6403            | 1.452E-03            | 3.6403     | 1.452E-03 |                 |           |              |           |
| NDUFA1    | 3.3906            | 1.091E-08            |            |           |                 |           |              |           |
| NDUFA11   | 6.1199            | 1.049E-06            |            |           |                 |           |              |           |
| OST4      | 3.0886            | 3.151E-07            | 3.0886     | 3.151E-07 |                 |           |              |           |
| RAN       | 3.1684            | 1.771E-08            | 3.1684     | 1.771E-08 |                 |           |              |           |
| SEC61B    | 4.8144            | 3.775E-05            | 4.8144     | 3.775E-05 |                 |           |              |           |
| SLC25A3   | 3.0109            | 3.922E-06            | 3.0109     | 3.922E-06 |                 |           |              |           |
| SNHG6     | 4.6243            | 8.876E-05            |            |           |                 |           |              |           |
| SNRPB     | 5.1049            | 1.082E-10            |            |           |                 |           |              |           |
| SNRPD2    | 5.3411            | 7.471E-12            |            |           |                 |           |              |           |
| SNRPG     | 7.5669            | 9.708E-08            |            |           |                 |           |              |           |
| TMSB10    | 4.7962            | 1.349E-07            | 4.7962     | 1.349E-07 |                 |           |              |           |
| UBA52     | 4.1412            | 1.268E-04            | 4.1412     | 1.268E-04 |                 |           |              |           |
| UBL5      | 6.0870            | 3.274E-07            |            |           |                 |           |              |           |
| UQCRH     | 3.7716            | 9.387E-05            | 3.7716     | 9.387E-05 |                 |           |              |           |
| CD70      |                   |                      | 4.5856     | 1.191E-05 |                 |           |              |           |
| COX5A     |                   |                      | 3.8030     | 6.940E-07 |                 |           |              |           |
| COX5B     |                   |                      | 3.5677     | 1.128E-09 |                 |           |              |           |
| CRIP1     |                   |                      | 5.1782     | 9.878E-04 |                 |           |              |           |
| CYBA      |                   |                      | 4.8507     | 7.488E-06 |                 |           |              |           |
| EBI3      |                   |                      | 6.2424     | 2.289E-03 |                 |           |              |           |
| EIF1      |                   |                      | 3.5457     | 1.106E-05 |                 |           |              |           |
| LGALS1    |                   |                      | 8.0153     | 4.765E-06 |                 |           |              |           |
| PFDN5     |                   |                      | 5.6825     | 7.933E-06 |                 |           |              |           |
| PSMB4     |                   |                      | 3.1028     | 3.737E-08 |                 |           |              |           |
| S100A4    |                   |                      | 6.5412     | 1.631E-05 |                 |           |              |           |
| DNAJB13   |                   |                      |            |           | 4.5702          | 5.122E-05 |              |           |
| ELF3      |                   |                      |            |           | 4.1088          | 2.000E-02 |              |           |
| GPC2      |                   |                      |            |           | 3.3392          | 3.800E-03 |              |           |
| KCNH4     |                   |                      |            |           | 3.0091          | 3.825E-02 |              |           |
| LRP5L     |                   |                      |            |           | 3.3193          | 8.830E-06 |              |           |
| MAP3K15   |                   |                      |            |           | 7.1109          | 9.306E-03 |              |           |
| RASGRP2   |                   |                      |            |           | 3.7308          | 3.300E-08 |              |           |
| SERPINA10 |                   |                      |            |           | 9.0643          | 2.732E-02 |              |           |
| SLC25A29  |                   |                      |            |           | 3.2889          | 4.968E-04 |              |           |
| SRMS      |                   |                      |            |           | 3.4191          | 3.223E-03 |              |           |
| KCP       |                   |                      |            |           |                 |           | 4.0113       | 1.019E-03 |
| P2RX1     |                   |                      |            |           |                 |           | 6.8758       | 3.972E-03 |

Note: <sup>1</sup>Fold (cluster1/cluster2+3)>3.0, <sup>2</sup>p<0.05.

Suppl. Table S4. List of gene ontology terms of differentially expressed genes in the MTX-resistant HKBML and TK cells.

| Group                  | Category         | Term                                                                                                                    | Fold Enrichment | PValue    | FDR       |
|------------------------|------------------|-------------------------------------------------------------------------------------------------------------------------|-----------------|-----------|-----------|
| (COMMON_UP)            |                  |                                                                                                                         |                 |           |           |
|                        | GOTERM_CC_DIRECT | GO:0070062~extracellular exosome                                                                                        | 4.777           | 7.630E-15 | 8.737E-12 |
|                        | UP_KEYWORDS      | Acetylation                                                                                                             | 4.429           | 5.251E-14 | 6.029E-11 |
|                        | GOTERM_CC_DIRECT | GO:0016020~membrane                                                                                                     | 3.924           | 3.374E-07 | 3.850E-04 |
|                        | GOTERM_CC_DIRECT | GO:0043209~myelin sheath                                                                                                | 22.086          | 5.727E-07 | 6.533E-04 |
|                        | GOTERM_CC_DIRECT | GO:0031982~vesicle                                                                                                      | 22.480          | 5.752E-06 | 6.563E-03 |
|                        | UP_SEQ_FEATURE   | cross-link:Glycyl lysine isopeptide (Lys-Gly) (interchain with G-Cter in ubiquitin)                                     | 14.493          | 6.641E-06 | 7.634E-03 |
|                        | UP_KEYWORDS      | Mitochondrion inner membrane                                                                                            | 14.042          | 7.968E-06 | 9.146E-03 |
|                        | GOTERM_BP_DIRECT | GO:1902600~hydrogen ion transmembrane transport                                                                         | 37.200          | 8.509E-06 | 1.192E-02 |
|                        | GOTERM_BP_DIRECT | GO:0006123~mitochondrial electron transport, cytochrome c to oxygen                                                     | 90.768          | 1.006E-05 | 1.409E-02 |
|                        | GOTERM_MF_DIRECT | GO:0044822~poly(A) RNA binding                                                                                          | 4.849           | 1.447E-05 | 1.700E-02 |
|                        | GOTERM_MF_DIRECT | GO:0005515~protein binding                                                                                              | 1.662           | 1.806E-05 | 2.123E-02 |
|                        | UP_KEYWORDS      | Isopeptide bond                                                                                                         | 5.263           | 2.170E-05 | 2.491E-02 |
|                        | GOTERM_CC_DIRECT | GO:0031012~extracellular matrix                                                                                         | 11.341          | 2.656E-05 | 3.030E-02 |
|                        | GOTERM_MF_DIRECT | GO:0004129~cytochrome-c oxidase activity                                                                                | 60.832          | 3.476E-05 | 4.085E-02 |
|                        | UP_KEYWORDS      | Cytoplasm                                                                                                               | 2.362           | 5.366E-05 | 6.158E-02 |
|                        | KEGG_PATHWAY     | hsa05012:Parkinson's disease                                                                                            | 11.626          | 1.082E-04 | 1.198E-01 |
|                        | KEGG_PATHWAY     | hsa04260:Cardiac muscle contraction                                                                                     | 18.344          | 1.174E-04 | 1.300E-01 |
|                        | UP_KEYWORDS      | Ubl conjugation                                                                                                         | 3.812           | 1.381E-04 | 1.585E-01 |
|                        | GOTERM_CC_DIRECT | GO:0005634~nucleus                                                                                                      | 2.037           | 1.611E-04 | 1.836E-01 |
|                        | KEGG_PATHWAY     | hsa05010:Alzheimer's disease                                                                                            | 9.827           | 2.387E-04 | 2.642E-01 |
|                        | UP_SEQ_FEATURE   | transit peptide:Mitochondrion                                                                                           | 7.668           | 2.302E-04 | 2.643E-01 |
|                        | GOTERM_CC_DIRECT | GO:0005743~mitochondrial inner membrane                                                                                 | 7.612           | 2.388E-04 | 2.721E-01 |
|                        | GOTERM_BP_DIRECT | GO:0006091~generation of precursor metabolites and energy                                                               | 34.252          | 1.969E-04 | 2.755E-01 |
|                        | GOTERM_CC_DIRECT | GO:0005751~mitochondrial respiratory chain complex IV                                                                   | 110.672         | 3.085E-04 | 3.514E-01 |
|                        | GOTERM_BP_DIRECT | GO:0098609~cell-cell adhesion                                                                                           | 10.048          | 2.641E-04 | 3.693E-01 |
|                        | UP_KEYWORDS      | Methylation                                                                                                             | 4.870           | 3.334E-04 | 3.820E-01 |
|                        | GOTERM_MF_DIRECT | GO:0098641~cadherin binding involved in cell-cell adhesion                                                              | 9.440           | 3.522E-04 | 4.132E-01 |
|                        | GOTERM_CC_DIRECT | GO:0005829~cytosol                                                                                                      | 2.459           | 3.660E-04 | 4.168E-01 |
|                        | KEGG_PATHWAY     | hsa05016:Huntington's disease                                                                                           | 8.599           | 4.435E-04 | 4.902E-01 |
|                        | GOTERM_CC_DIRECT | GO:0005913~cell-cell adherens junction                                                                                  | 8.909           | 4.640E-04 | 5.281E-01 |
|                        | UP_KEYWORDS      | Mitochondrion                                                                                                           | 4.356           | 7.005E-04 | 8.011E-01 |
|                        | KEGG_PATHWAY     | hsa00190:Oxidative phosphorylation                                                                                      | 10.344          | 1.051E-03 | 1.158E+00 |
|                        | GOTERM_CC_DIRECT | GO:0005739~mitochondrion                                                                                                | 3.603           | 1.103E-03 | 1.251E+00 |
|                        | KEGG_PATHWAY     | hsa04932:Non-alcoholic fatty liver disease (NAFLD)                                                                      | 9.111           | 1.683E-03 | 1.849E+00 |
|                        | UP_KEYWORDS      | Phosphoprotein                                                                                                          | 1.642           | 1.988E-03 | 2.259E+00 |
|                        | UP_KEYWORDS      | Transit peptide                                                                                                         | 6.063           | 2.575E-03 | 2.916E+00 |
|                        | GOTERM_BP_DIRECT | GO:0030036~actin cytoskeleton organization                                                                              | 13.964          | 2.686E-03 | 3.698E+00 |
|                        | GOTERM_BP_DIRECT | GO:0043066~negative regulation of apoptotic process                                                                     | 5.985           | 2.694E-03 | 3.708E+00 |
|                        | GOTERM_CC_DIRECT | GO:0005615~extracellular space                                                                                          | 3.204           | 4.880E-03 | 5.428E+00 |
|                        | GOTERM_CC_DIRECT | GO:0005925~focal adhesion                                                                                               | 6.133           | 7.881E-03 | 8.632E+00 |
|                        | GOTERM_BP_DIRECT | GO:0002906~negative regulation of mature B cell apoptotic process                                                       | 226.919         | 8.549E-03 | 1.133E+01 |
|                        | KEGG_PATHWAY     | hsa05130:Pathogenic Escherichia coli infection                                                                          | 16.186          | 1.340E-02 | 1.389E+01 |
|                        | UP_KEYWORDS      | Actin-binding                                                                                                           | 7.907           | 1.299E-02 | 1.394E+01 |
|                        | GOTERM_BP_DIRECT | GO:2000343~positive regulation of chemokine (C-X-C motif) ligand 2 production                                           | 181.535         | 1.067E-02 | 1.396E+01 |
|                        | KEGG_PATHWAY     | hsa05110:Vibrio cholerae infection                                                                                      | 15.875          | 1.391E-02 | 1.437E+01 |
|                        | UP_KEYWORDS      | Cytoskeleton                                                                                                            | 3.331           | 1.505E-02 | 1.598E+01 |
|                        | BIOCARTA         | h_rhoPathway:Rho cell motility signaling pathway                                                                        | 11.949          | 2.077E-02 | 1.697E+01 |
|                        | GOTERM_CC_DIRECT | GO:0042470~melanosome                                                                                                   | 14.245          | 1.786E-02 | 1.858E+01 |
|                        | GOTERM_CC_DIRECT | GO:0005737~cytoplasm                                                                                                    | 1.653           | 1.880E-02 | 1.947E+01 |
|                        | KEGG_PATHWAY     | hsa05131:Shigellosis                                                                                                    | 12.898          | 2.062E-02 | 2.061E+01 |
|                        | GOTERM_BP_DIRECT | GO:0006412~translation                                                                                                  | 7.175           | 1.673E-02 | 2.105E+01 |
|                        | GOTERM_BP_DIRECT | GO:0032872~regulation of stress-activated MAPK cascade                                                                  | 113.459         | 1.703E-02 | 2.138E+01 |
|                        | GOTERM_MF_DIRECT | GO:0042802~identical protein binding                                                                                    | 3.655           | 2.046E-02 | 2.157E+01 |
|                        | KEGG_PATHWAY     | hsa00010:Glycolysis / Gluconeogenesis                                                                                   | 12.321          | 2.247E-02 | 2.226E+01 |
|                        | GOTERM_BP_DIRECT | GO:0043030~regulation of macrophage activation                                                                          | 100.853         | 1.913E-02 | 2.371E+01 |
|                        | GOTERM_MF_DIRECT | GO:0005200~structural constituent of cytoskeleton                                                                       | 12.443          | 2.295E-02 | 2.388E+01 |
|                        | GOTERM_CC_DIRECT | GO:0005746~mitochondrial respiratory chain                                                                              | 68.511          | 2.806E-02 | 2.773E+01 |
|                        | GOTERM_BP_DIRECT | GO:0019068~virion assembly                                                                                              | 75.640          | 2.543E-02 | 3.029E+01 |
|                        | UP_KEYWORDS      | Host-virus interaction                                                                                                  | 5.627           | 3.157E-02 | 3.080E+01 |
|                        | KEGG_PATHWAY     | hsa05132:Salmonella infection                                                                                           | 9.946           | 3.344E-02 | 3.139E+01 |
|                        | GOTERM_BP_DIRECT | GO:1902166~negative regulation of intrinsic apoptotic signaling pathway in response to DNA damage by p53 class mediator | 69.821          | 2.752E-02 | 3.236E+01 |
|                        | GOTERM_BP_DIRECT | GO:0019752~carboxylic acid metabolic process                                                                            | 69.821          | 2.752E-02 | 3.236E+01 |
|                        | GOTERM_BP_DIRECT | GO:0043518~negative regulation of DNA damage response, signal transduction by p53 class mediator                        | 69.821          | 2.752E-02 | 3.236E+01 |
|                        | GOTERM_BP_DIRECT | GO:0050900~leukocyte migration                                                                                          | 11.160          | 2.808E-02 | 3.290E+01 |
|                        | KEGG_PATHWAY     | hsa04810:Regulation of actin cytoskeleton                                                                               | 5.241           | 3.541E-02 | 3.293E+01 |
|                        | GOTERM_MF_DIRECT | GO:0023026~MHC class II protein complex binding                                                                         | 57.030          | 3.360E-02 | 3.308E+01 |
|                        | GOTERM_BP_DIRECT | GO:0001516~prostaglandin biosynthetic process                                                                           | 64.834          | 2.961E-02 | 3.436E+01 |
|                        | GOTERM_BP_DIRECT | GO:0038096~Fc-gamma receptor signaling pathway involved in phagocytosis                                                 | 10.721          | 3.024E-02 | 3.496E+01 |
|                        | GOTERM_BP_DIRECT | GO:0050821~protein stabilization                                                                                        | 10.011          | 3.428E-02 | 3.866E+01 |
|                        | GOTERM_CC_DIRECT | GO:0005771~multivesicular body                                                                                          | 43.598          | 4.375E-02 | 3.997E+01 |
|                        | UP_KEYWORDS      | Oxidation                                                                                                               | 40.119          | 4.745E-02 | 4.277E+01 |
|                        | UP_SEQ_FEATURE   | topological domain:Mitochondrial matrix                                                                                 | 39.109          | 4.865E-02 | 4.364E+01 |
|                        | GOTERM_MF_DIRECT | GO:0005525~GTP binding                                                                                                  | 4.753           | 4.797E-02 | 4.389E+01 |
| (HKBMLMTX_SPECIFIC_UP) |                  |                                                                                                                         |                 |           |           |
|                        | GOTERM_CC_DIRECT | GO:0070062~extracellular exosome                                                                                        | 3.456           | 5.999E-05 | 6.344E-02 |
|                        | GOTERM_CC_DIRECT | GO:0005687~U4 snRNP                                                                                                     | 185.587         | 1.018E-04 | 1.077E-01 |
|                        | SMART            | SM00651:Sm                                                                                                              | 125.723         | 2.054E-04 | 1.427E-01 |
|                        | GOTERM_CC_DIRECT | GO:0005682~U5 snRNP                                                                                                     | 119.306         | 2.560E-04 | 2.705E-01 |
|                        | INTERPRO         | IPR001163:Ribonucleoprotein LSM domain                                                                                  | 115.515         | 2.756E-04 | 2.880E-01 |
|                        | GOTERM_CC_DIRECT | GO:0071013~catalytic step 2 spliceosome                                                                                 | 29.694          | 2.804E-04 | 2.962E-01 |

Suppl. Table S4. List of gene ontology terms of differentially expressed genes in the MTX-resistant HKBML and TK cells. (Continued)

|                          |                                                                     |         |           |           |
|--------------------------|---------------------------------------------------------------------|---------|-----------|-----------|
| GOTERM_CC_DIRECT         | GO:0005685-U1 snRNP                                                 | 111.352 | 2.951E-04 | 3.117E-01 |
| INTERPRO                 | IPR010920:Like-Sm (LSM) domain                                      | 102.680 | 3.507E-04 | 3.664E-01 |
| GOTERM_MF_DIRECT         | GO:0044822~poly(A) RNA binding                                      | 5.122   | 4.485E-04 | 4.292E-01 |
| GOTERM_CC_DIRECT         | GO:0005686-U2 snRNP                                                 | 87.909  | 4.786E-04 | 5.051E-01 |
| GOTERM_CC_DIRECT         | GO:0019815~B cell receptor complex                                  | 371.173 | 5.164E-03 | 5.330E+00 |
| GOTERM_CC_DIRECT         | GO:0005737~cytoplasm                                                | 2.395   | 6.832E-03 | 6.995E+00 |
| GOTERM_BP_DIRECT         | GO:0000398~mRNA splicing, via spliceosome                           | 22.015  | 7.408E-03 | 8.251E+00 |
| KEGG_PATHWAY             | cfa03040:Spliceosome                                                | 9.100   | 8.052E-03 | 8.004E+00 |
| SMART                    | SM00077:ITAM                                                        | 209.538 | 8.781E-03 | 5.948E+00 |
| INTERPRO                 | IPR003110:Phosphorylated immunoreceptor signaling ITAM              | 205.360 | 9.315E-03 | 9.331E+00 |
| GOTERM_CC_DIRECT         | GO:0034709~methylosome                                              | 159.074 | 1.201E-02 | 1.200E+01 |
| UP_KEYWORDS              | Cytoplasm                                                           | 7.261   | 1.524E-02 | 1.318E+01 |
| UP_KEYWORDS              | Phosphoprotein                                                      | 7.162   | 1.581E-02 | 1.364E+01 |
| UP_KEYWORDS              | Acetylation                                                         | 14.246  | 1.722E-02 | 1.477E+01 |
| GOTERM_CC_DIRECT         | GO:0034719~SMN-Sm protein complex                                   | 85.655  | 2.219E-02 | 2.113E+01 |
| GOTERM_CC_DIRECT         | GO:0071004~U2-type prespliceosome                                   | 69.595  | 2.725E-02 | 2.534E+01 |
| GOTERM_CC_DIRECT         | GO:0046540~U4/U6 x U5 tri-snRNP complex                             | 58.606  | 3.228E-02 | 2.932E+01 |
| GOTERM_BP_DIRECT         | GO:0000387~spliceosomal snRNP assembly                              | 53.570  | 3.514E-02 | 3.392E+01 |
| GOTERM_CC_DIRECT         | GO:0005689~U12-type spliceosomal complex                            | 48.414  | 3.895E-02 | 3.431E+01 |
| GOTERM_CC_DIRECT         | GO:0071011~pre-catalytic spliceosome                                | 46.397  | 4.060E-02 | 3.550E+01 |
| GOTERM_CC_DIRECT         | GO:0001772~immunological synapse                                    | 38.397  | 4.886E-02 | 4.113E+01 |
| (TKMTX_SPECIFIC_UP)      |                                                                     |         |           |           |
| UP_KEYWORDS              | Acetylation                                                         | 7.445   | 1.107E-11 | 1.159E-08 |
| UP_KEYWORDS              | Phosphoprotein                                                      | 3.421   | 7.499E-05 | 7.847E-02 |
| GOTERM_BP_DIRECT         | GO:0055114~oxidation-reduction process                              | 10.095  | 2.205E-04 | 2.636E-01 |
| GOTERM_CC_DIRECT         | GO:0070062~extracellular exosome                                    | 3.301   | 2.614E-04 | 2.443E-01 |
| UP_KEYWORDS              | Metal-binding                                                       | 3.898   | 4.089E-04 | 4.272E-01 |
| UP_KEYWORDS              | Chaperone                                                           | 22.831  | 6.159E-04 | 6.428E-01 |
| GOTERM_MF_DIRECT         | GO:0016531~copper chaperone activity                                | 523.800 | 3.662E-03 | 3.516E+00 |
| KEGG_PATHWAY             | bta00190:Oxidative phosphorylation                                  | 10.786  | 4.864E-03 | 4.646E+00 |
| KEGG_PATHWAY             | bta04978:Mineral absorption                                         | 25.739  | 5.330E-03 | 5.080E+00 |
| UP_KEYWORDS              | Electron transport                                                  | 23.087  | 6.876E-03 | 6.967E+00 |
| GOTERM_BP_DIRECT         | GO:2000510~positive regulation of dendritic cell chemotaxis         | 212.677 | 9.011E-03 | 1.027E+01 |
| GOTERM_BP_DIRECT         | GO:0045730~respiratory burst                                        | 151.912 | 1.259E-02 | 1.407E+01 |
| UP_KEYWORDS              | Transport                                                           | 3.809   | 1.557E-02 | 1.515E+01 |
| GOTERM_BP_DIRECT         | GO:0006457~protein folding                                          | 14.907  | 1.586E-02 | 1.741E+01 |
| KEGG_PATHWAY             | bta04260:Cardiac muscle contraction                                 | 14.156  | 1.687E-02 | 1.530E+01 |
| UP_KEYWORDS              | Oxidoreductase                                                      | 6.901   | 1.758E-02 | 1.694E+01 |
| GOTERM_BP_DIRECT         | GO:0006123~mitochondrial electron transport, cytochrome c to oxygen | 88.615  | 2.150E-02 | 2.290E+01 |
| GOTERM_CC_DIRECT         | GO:0043209~myelin sheath                                            | 12.652  | 2.160E-02 | 1.848E+01 |
| GOTERM_CC_DIRECT         | GO:0005751~mitochondrial respiratory chain complex IV               | 84.951  | 2.241E-02 | 1.911E+01 |
| GOTERM_CC_DIRECT         | GO:0045277~respiratory chain complex IV                             | 74.332  | 2.557E-02 | 2.152E+01 |
| GOTERM_CC_DIRECT         | GO:0009897~external side of plasma membrane                         | 11.363  | 2.638E-02 | 2.213E+01 |
| UP_KEYWORDS              | Mitochondrion inner membrane                                        | 10.646  | 2.977E-02 | 2.712E+01 |
| UP_KEYWORDS              | Iron                                                                | 9.738   | 3.506E-02 | 3.117E+01 |
| UP_KEYWORDS              | Redox-active center                                                 | 48.923  | 3.860E-02 | 3.377E+01 |
| GOTERM_BP_DIRECT         | GO:0050766~positive regulation of phagocytosis                      | 48.336  | 3.907E-02 | 3.794E+01 |
| GOTERM_CC_DIRECT         | GO:0005737~cytoplasm                                                | 1.913   | 4.809E-02 | 3.694E+01 |
| (HKBMLMTX_SPECIFIC_DOWN) |                                                                     |         |           |           |
| UP_KEYWORDS              | Alternative splicing                                                | 1.404   | 2.123E-03 | 2.424E+00 |
| UP_SEQ_FEATURE           | splice variant                                                      | 1.442   | 1.354E-02 | 1.568E+01 |
| (TKMTX_SPECIFIC_DOWN)    |                                                                     |         |           |           |
| UP_KEYWORDS              | Metal-binding                                                       | 2.625   | 1.144E-03 | 1.233E+00 |
| UP_KEYWORDS              | Zinc                                                                | 2.817   | 8.566E-03 | 8.897E+00 |
| UP_SEQ_FEATURE           | disulfide bond                                                      | 2.372   | 1.453E-02 | 1.607E+01 |
| UP_KEYWORDS              | Zinc-finger                                                         | 2.889   | 2.532E-02 | 2.426E+01 |
| UP_SEQ_FEATURE           | zinc finger region:C2H2-type 7                                      | 5.977   | 2.609E-02 | 2.712E+01 |
| UP_KEYWORDS              | Disulfide bond                                                      | 2.140   | 2.646E-02 | 2.521E+01 |
| UP_SEQ_FEATURE           | zinc finger region:C2H2-type 6                                      | 5.524   | 3.193E-02 | 3.219E+01 |
| UP_KEYWORDS              | Signal                                                              | 1.944   | 3.245E-02 | 3.005E+01 |
| UP_SEQ_FEATURE           | signal peptide                                                      | 2.068   | 3.329E-02 | 3.332E+01 |
| KEGG_PATHWAY             | hsa05310:Asthma                                                     | 50.956  | 3.438E-02 | 2.516E+01 |
| UP_SEQ_FEATURE           | splice variant                                                      | 1.516   | 3.647E-02 | 3.590E+01 |
| UP_KEYWORDS              | Secreted                                                            | 2.618   | 3.869E-02 | 3.478E+01 |
| UP_SEQ_FEATURE           | zinc finger region:C2H2-type 5                                      | 5.031   | 4.040E-02 | 3.896E+01 |
| UP_SEQ_FEATURE           | zinc finger region:C2H2-type 1                                      | 4.995   | 4.114E-02 | 3.952E+01 |
| UP_SEQ_FEATURE           | zinc finger region:C2H2-type 4                                      | 4.706   | 4.769E-02 | 4.428E+01 |

Suppl. Table S5. Summary of functional GSEA for the MTX-resistant HKBML and TK cells.

|                                                                                                                                     | SIZE | ES    | NES   | NOM p-val | FDR q-val | FWER p-val | RANK AT MAX | LEADING EDGE                   |
|-------------------------------------------------------------------------------------------------------------------------------------|------|-------|-------|-----------|-----------|------------|-------------|--------------------------------|
| (HKMBLMTX_UP)                                                                                                                       |      |       |       |           |           |            |             |                                |
| GSE3982_NEUTROPHIL_VS_BCELL_DN                                                                                                      | 19   | 0.574 | 1.611 | 0.019     | 0.726     | 0.261      | 35          | tags=53%, list=18%, signal=58% |
| GSE1460_DP_THYMOCYTE_VS_NAIVE_CD4_TCELL_ADULT_BLOOD_DN                                                                              | 16   | 0.558 | 1.526 | 0.032     | 0.692     | 0.378      | 67          | tags=69%, list=35%, signal=97% |
| MODULE_29                                                                                                                           | 23   | 0.632 | 1.646 | 0.034     | 0.041     | 0.022      | 41          | tags=65%, list=22%, signal=73% |
| REACTOME_FORMATION_OF_THE_TERNARY_COMPLEX_AND_SUBSEQUENTLY_THE_43S_COMPLEX                                                          | 29   | 0.575 | 1.492 | 0.067     | 0.787     | 0.058      | 56          | tags=66%, list=29%, signal=79% |
| GSE22886_NAIVE_BCELL_VS_NEUTROPHIL_UP                                                                                               | 50   | 0.472 | 1.398 | 0.077     | 0.864     | 0.520      | 63          | tags=54%, list=33%, signal=60% |
| REACTOME_ACTIVATION_OF_THE_MRNA_UPON_BINDING_OF_THE_CAP_BINDING_COMPLEX_AND_EIFS_AND_SUBSEQUENT_BINDING_TO_43S                      | 30   | 0.561 | 1.450 | 0.078     | 0.525     | 0.075      | 56          | tags=63%, list=29%, signal=76% |
| GSE41978_KLRG1_HIGH_VS_LOW_EFFECTOR_CD8_TCELL_DN                                                                                    | 54   | 0.453 | 1.414 | 0.081     | 1.000     | 0.503      | 78          | tags=61%, list=41%, signal=74% |
| (TKMTX_UP)                                                                                                                          |      |       |       |           |           |            |             |                                |
| GSE26030_TH1_VS_TH17_DAY15_POST_POLARIZATION_DN                                                                                     | 15   | 0.543 | 1.562 | 0.012     | 0.620     | 0.334      | 71          | tags=67%, list=37%, signal=98% |
| GSE1460_DP_THYMOCYTE_VS_NAIVE_CD4_TCELL_ADULT_BLOOD_DN                                                                              | 21   | 0.529 | 1.597 | 0.040     | 0.896     | 0.280      | 65          | tags=62%, list=34%, signal=83% |
| MODULE_29                                                                                                                           | 24   | 0.599 | 1.579 | 0.051     | 0.270     | 0.076      | 50          | tags=67%, list=26%, signal=79% |
| GSE3982_NEUTROPHIL_VS_BCELL_DN                                                                                                      | 19   | 0.528 | 1.466 | 0.067     | 0.813     | 0.440      | 44          | tags=53%, list=23%, signal=62% |
| (HKMBLMTX_DOWN)                                                                                                                     |      |       |       |           |           |            |             |                                |
| none of the gene sets passed size thresholds                                                                                        |      |       |       |           |           |            |             |                                |
| (TKMTX_DOWN)                                                                                                                        |      |       |       |           |           |            |             |                                |
| none of the gene sets passed size thresholds                                                                                        |      |       |       |           |           |            |             |                                |
| Note: ES; enrichment score, NES; normalized enrichment score. NOM; nominal, FDR; false-discovery rate, FWER; familywise error rate. |      |       |       |           |           |            |             |                                |



**Suppl. Table S6. Summary of the protein-protein interaction analysis.**

|                           | <b>HKBML-MTX (%)</b> | <b>TK-MTX (%)</b> | <b>PCNSL POOR (%)</b> |
|---------------------------|----------------------|-------------------|-----------------------|
| <b>Genes entered</b>      | <b>200 (100)</b>     | <b>200 (100)</b>  | <b>300 (100)</b>      |
| <b>Genes detected</b>     | <b>122 (61)</b>      | <b>117 (58.5)</b> | <b>221 (73.6)</b>     |
| <b>Genes clustered</b>    | <b>92 (46)</b>       | <b>82 (41)</b>    | <b>177 (59)</b>       |
| <b>Numbers of cluster</b> | <b>11</b>            | <b>5</b>          | <b>14</b>             |
| <b>Seed genes</b>         | <b>4 (2)</b>         | <b>5 (2.5)</b>    | <b>12 (4)</b>         |
| <b>Clustered genes</b>    | <b>79 (39.5)</b>     | <b>77 (38.5)</b>  | <b>165 (55)</b>       |
| <b>Unclustered genes</b>  | <b>9 (4.5)</b>       | <b>0 (0)</b>      | <b>0 (0)</b>          |
| <b>Numbers of edge</b>    | <b>5236</b>          | <b>4422</b>       | <b>10101</b>          |
| <b>Median</b>             | <b>62.5</b>          | <b>55</b>         | <b>32</b>             |
| <b>Ave</b>                | <b>42.9</b>          | <b>37.7</b>       | <b>45.7</b>           |
| <b>max</b>                | <b>77</b>            | <b>69</b>         | <b>115</b>            |
| <b>Min</b>                | <b>1</b>             | <b>1</b>          | <b>1</b>              |

Suppl. Table S7. Characteristics of the PCNSL patients in the study.

|                    |                     | N (%)     | OS <sup>a</sup> (days): Median (Min–Max) | Univariable analysis                   |         | Multivariable analysis |         |
|--------------------|---------------------|-----------|------------------------------------------|----------------------------------------|---------|------------------------|---------|
|                    |                     |           |                                          | HR <sup>b</sup> (95% CI <sup>c</sup> ) | p-value | HR (95% CI)            | p-value |
| Total              |                     | 31 (100)  | 765 (188 - 3611)                         |                                        |         |                        |         |
| Age                | Age < 60            | 12 (38.7) | 994.5 (317.1 – 6378)                     | 1.0                                    |         | 1.0                    |         |
|                    | Age > 60            | 19 (61.2) | 936.9 (169.8 – 3738)                     | 1.23 (0.49 – 3.31)                     | 0.65    | 0.79 (0.18 – 3.20)     | 0.73    |
| Gender             | Male                | 16 (51.6) | 990 (169.8 – 6378)                       | 1.0                                    |         | 1.0                    |         |
|                    | Female              | 15 (48.3) | 951 (273 – 3738)                         | 0.45 (0.11 – 1.52)                     | 0.2     | 0.59 (0.19 – 1.74)     | 0.59    |
| KPS <sup>d</sup>   | KPS 0 – 60          | 19 (61.2) | 936.9 (169.8 – 317.1)                    | 1.0                                    |         | 1.0                    |         |
|                    | KPS 70 – 100        | 12 (38.7) | 1080 (317.1 – 6378)                      | 0.42 (0.13 – 1.16)                     | 0.09    | 0.24 (0.008 – 6.56)    | 0.34    |
| MSKCC <sup>e</sup> | MSKCC 1             | 4 (14.8)  | 1515 (840 – 3330)                        | 1.0                                    |         | 1.0                    |         |
|                    | MSKCC 2             | 9 (29.0)  | 951 (317.1 – 6378)                       | 1.19 (0.25 – 8.36)                     | 0.83    | 2.05 (0.20 – 48.22)    | 0.55    |
|                    | MSKCC 3             | 18 (58.0) | 948.45 (169.8 – 3171)                    | 2.22 (0.59 – 14.56)                    | 0.26    | 0.93 (0.10 – 20.66)    | 0.95    |
| IELSG <sup>f</sup> | IELSG 0 - 1         | 6 (19.3)  | 2175 (317.1 – 6378)                      | 1.0                                    |         | 1.0                    |         |
|                    | IELSG 2 - 3         | 20 (64.5) | 807.9 (169.8 – 3525)                     | 2.75 (0.81 – 12.82)                    | 0.1     | 3.42 (0.63 – 24.15)    | 0.15    |
|                    | IELSG 4 - 5         | 5 (16.1)  | 1429.2 (936.9 – 3171)                    | 1.51 (0.26 – 8.61)                     | 0.62    | 0.86 (0.07 – 11.91)    | 0.91    |
| Chemotherapy       | Ionizing radiation  | 3 (9.6)   | 762 (169.8 – 775.8)                      | 1.0                                    |         | 1.0                    |         |
|                    | Polychemotherapy    | 9 (29.0)  | 1429.2 (317.1 – 6378)                    | 0.24 (0.05 – 1.25)                     | 0.08    | 0.49 (0.04 – 4.33)     | 0.52    |
|                    | HD-MTX <sup>g</sup> | 19 (61.2) | 969 (273 – 3525)                         | 0.20 (0.05 – 0.98)                     | 0.04    | 0.24 (0.04 – 1.43)     | 0.11    |

Note: <sup>a</sup>OS; overall survival, <sup>b</sup>HR; hazard ratio, <sup>c</sup>CI; confidence interval, <sup>d</sup>KPS; Karnofsky Performance score, <sup>e</sup>MSKCC; Memorial Sloan Kettering Cancer Center risk score, <sup>f</sup>IELSG; International Extranodal Lymphoma Study Group risk score, <sup>g</sup>HD-MTX; high-dose methotrexate; p < 0.05, statistically significant.

**Suppl. Table S8. Characteristics of PCNSL cell lines HKBML and TK.**

|              | <b>Age (years)</b> | <b>Gender</b> | <b>Primary/secondary</b> | <b>Histology</b> | <b>HIV</b> | <b>EBV</b> |
|--------------|--------------------|---------------|--------------------------|------------------|------------|------------|
| <b>HKBML</b> | NA                 | Male          | primary                  | NA               | (-)        | (+)        |
| <b>TK</b>    | 22                 | Male          | primary                  | ABC-DLBCL        | (-)        | (-)        |

**Note:** (+); positive, (-); negative, HIV; human immunodeficiency virus, EBV; Epstein-Barr virus, ABC; activated B-cell-like subtype, NA; not applicable.

# Suppl. Fig. S1

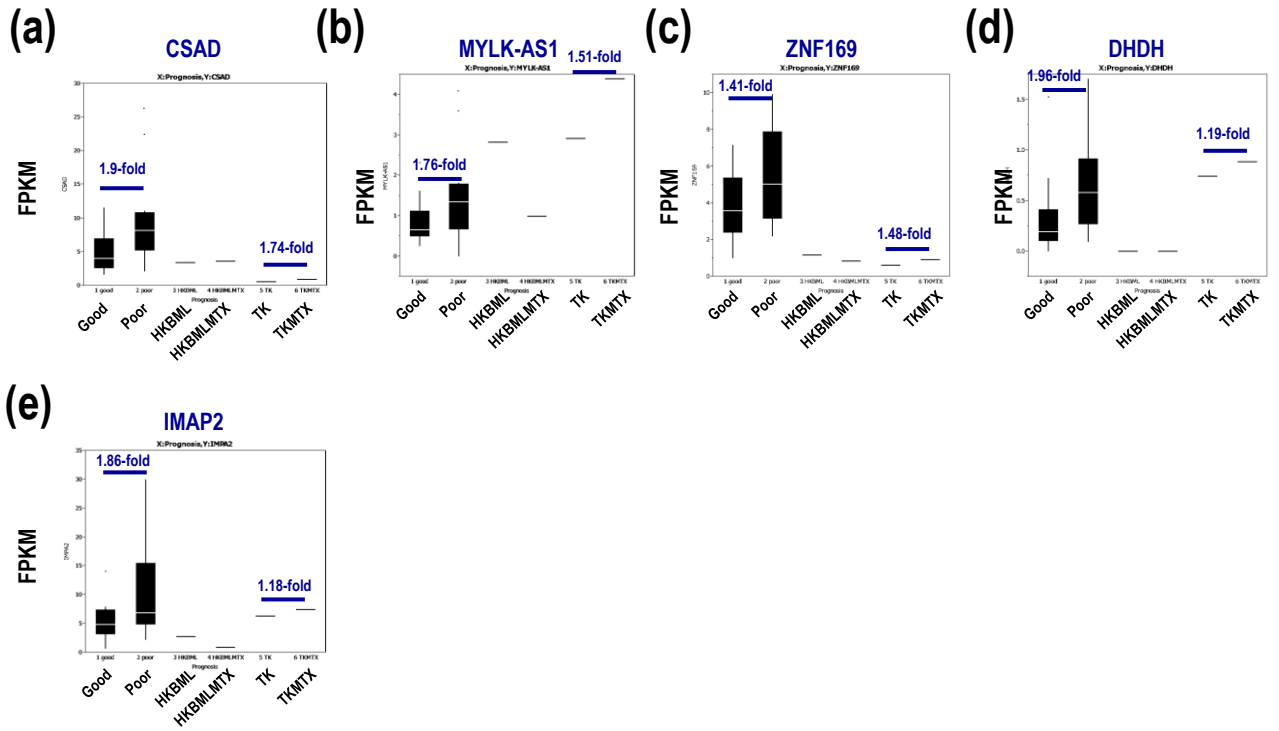

**Suppl. Fig. S1.** Precise expression of GSEA-associated marker candidates in PCNSL samples divided by prognoses in box-whisker plots. (a) FOXD2-AS1, (b) MYLK-AS1, (c) ZNF169, (d) DHDH, and (e) IMAP2 as secondary gene marker candidates for TK-type MTX-resistant PCNSL. FPKM; fragments per kilobase of exon model per million reads mapped.

# Suppl. Fig. S2

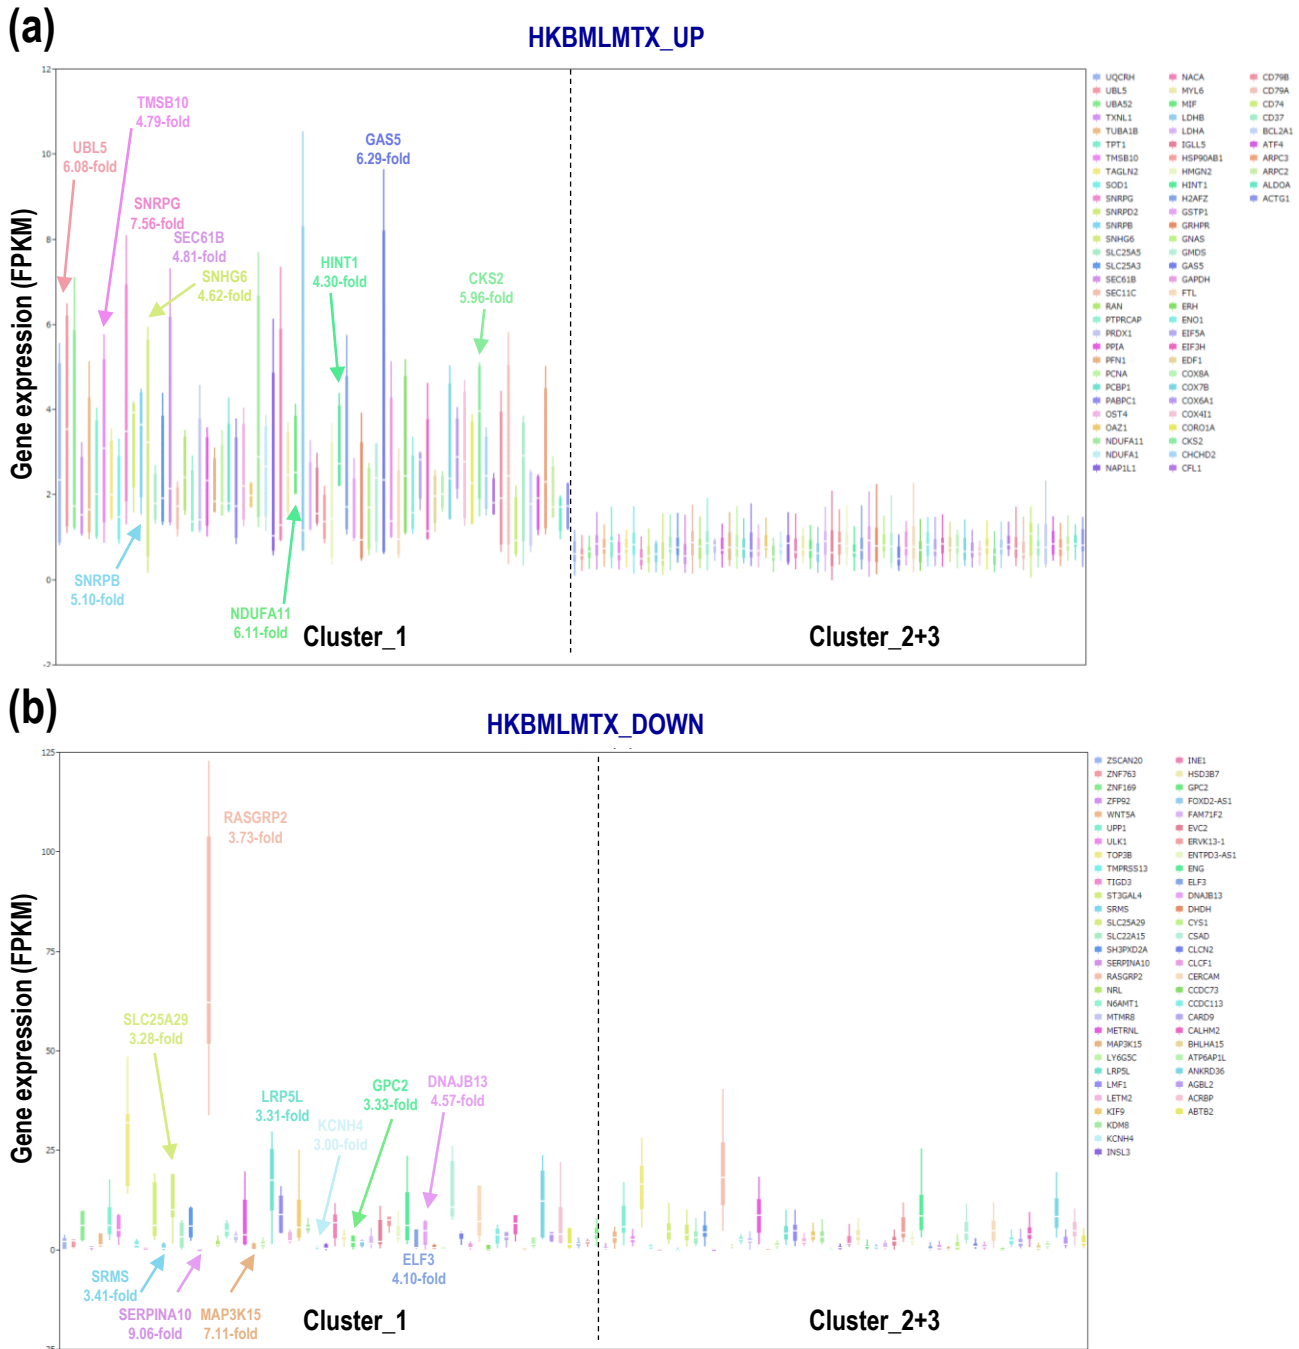

**Suppl. Fig. S2.** Gene expression profiling of GSEA-assisted marker candidates in PCNSL samples divided by hierarchical clustering method using the MTX-resistant HKBML-agitated genes. The groups were divided in Cluster 1 and the combined clusters 2 and 3. The results of gene expression patterns in PCNSL were displayed as box-whisker plots. **(a)** GSEA-assisted upregulated genes in the MTX-resistant HKBML. **(b)** GSEA-assisted downregulated genes in the MTX-resistant HKBML. FPKM; fragments per kilobase of exon model per million reads mapped. Representative genes upregulated in Cluster 1 than Clusters 2 and 3 ( $p < 0.05$ ).

# Suppl. Fig. S3

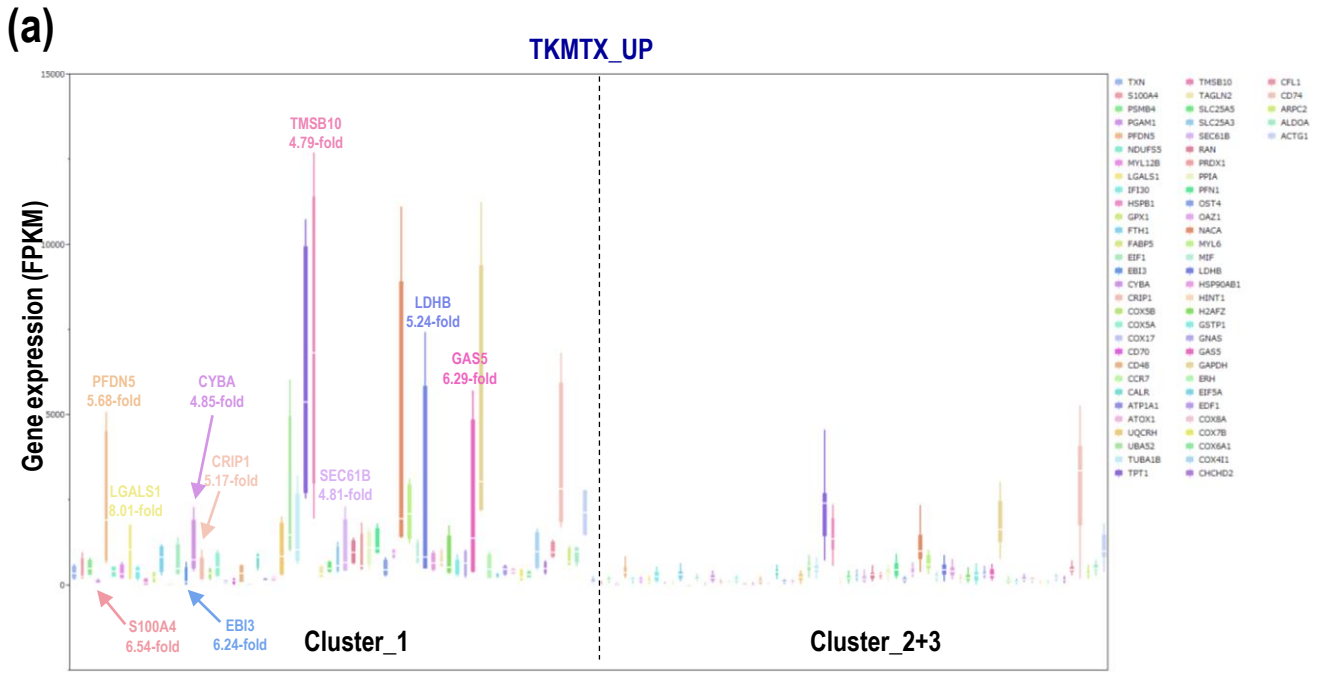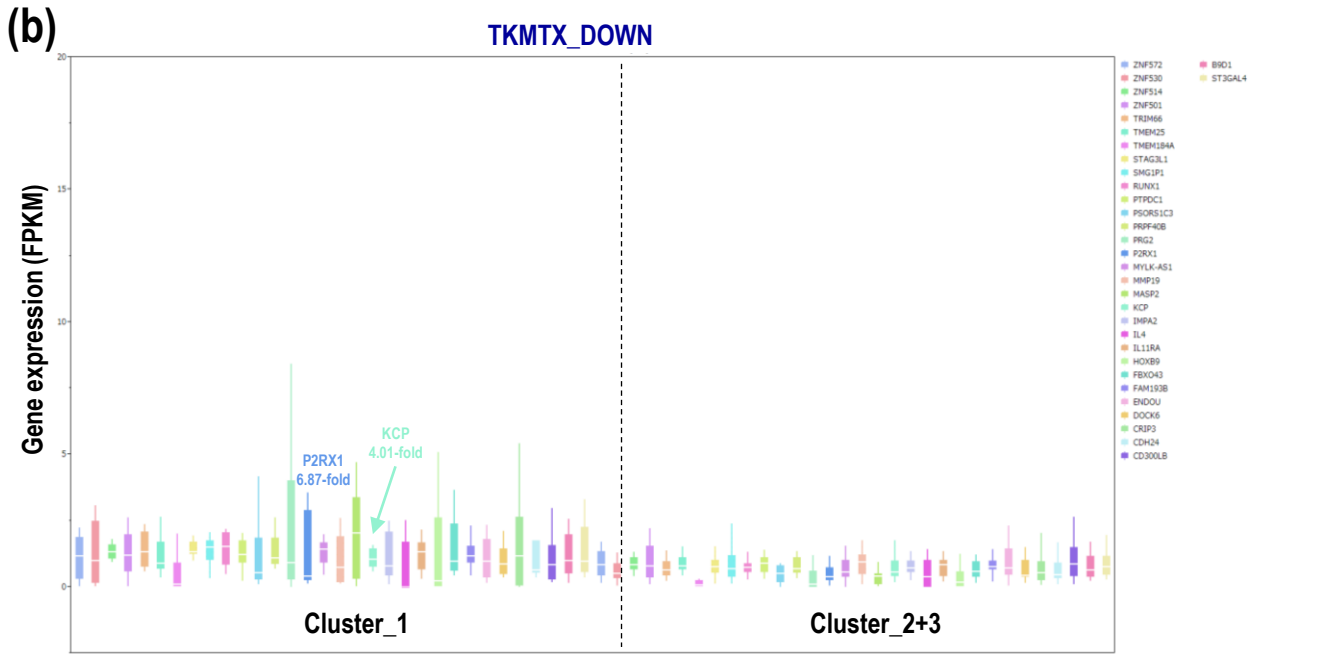

**Suppl. Fig. S3.** Gene expression profiling of GSEA-assisted marker candidates in PCNSL samples divided by hierarchical clustering method using the MTX-resistant TK-agitated genes. The groups were divided in Cluster 1 and the combined clusters 2 and 3. The results of gene expression patterns in PCNSL were displayed as box-whisker plots. **(a)** GSEA-assisted upregulated genes in the MTX-resistant TK. **(b)** GSEA-assisted downregulated genes in the MTX-resistant TK. FPKM; fragments per kilobase of exon model per million reads mapped. Representative genes upregulated in Cluster 1 than Clusters 2 and 3 ( $p < 0.05$ ).

# Suppl. Fig. S4

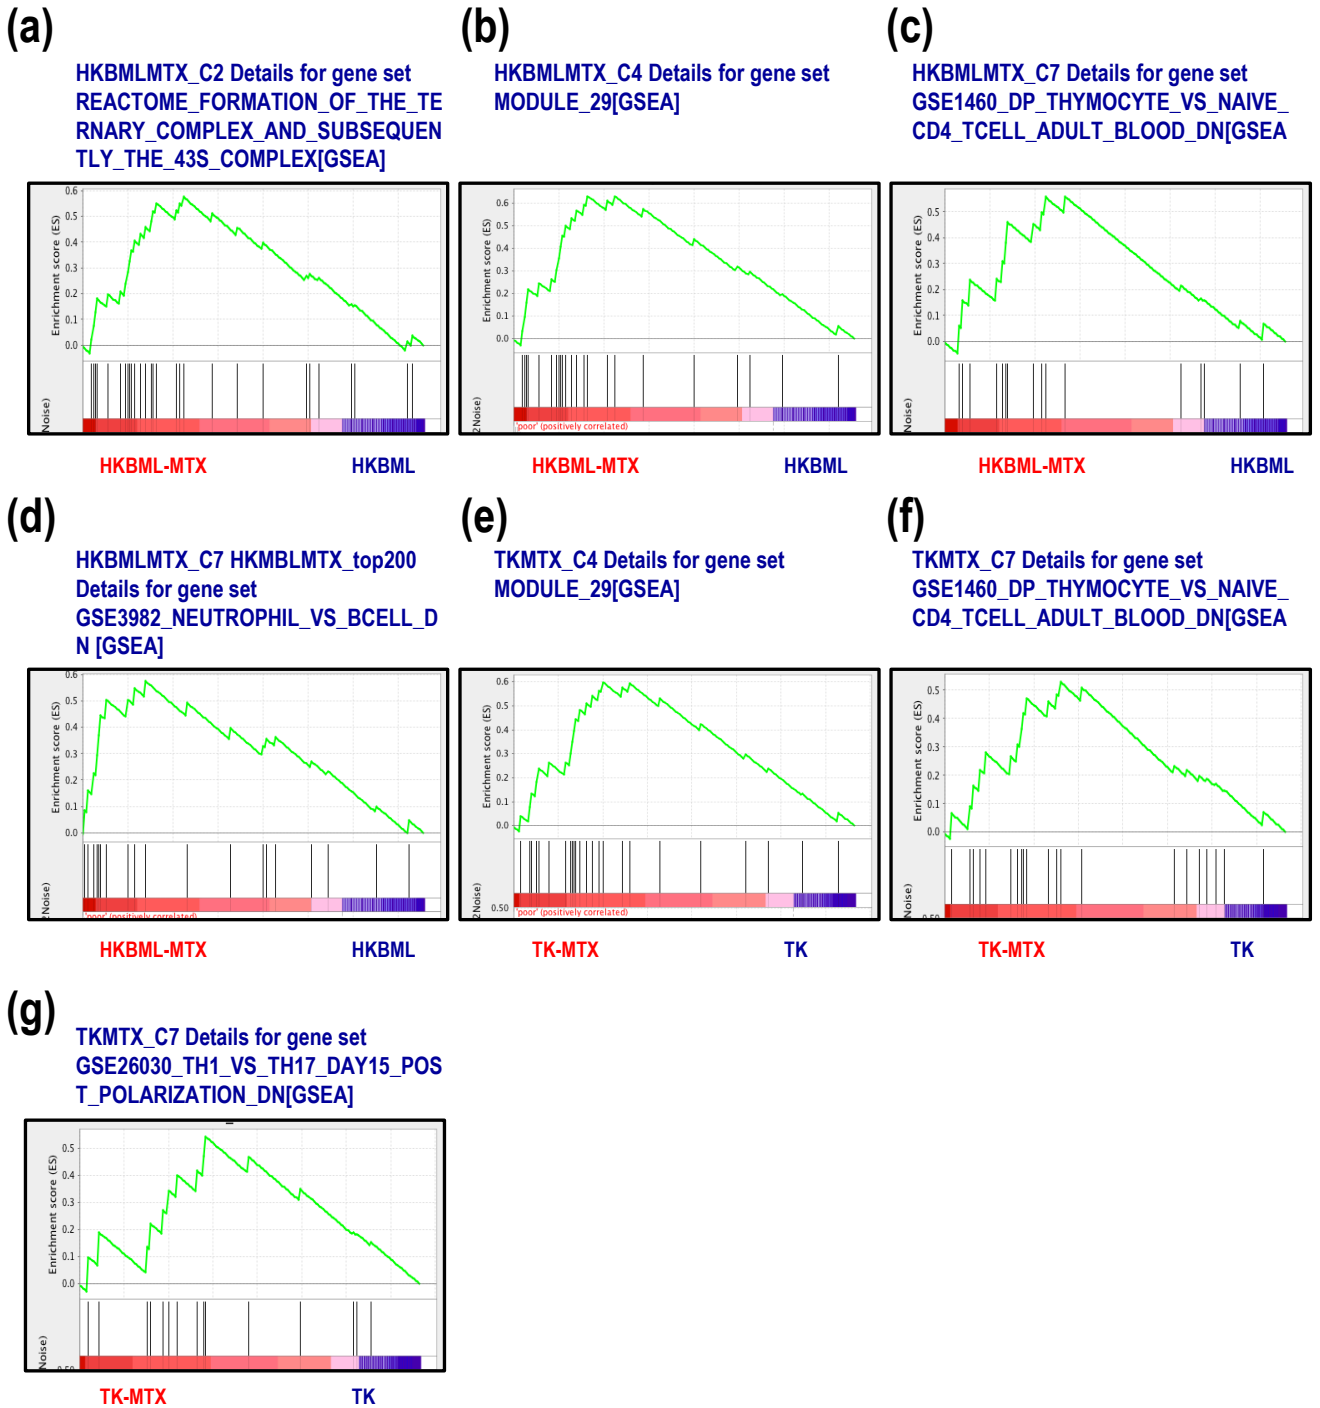

**Suppl. Fig .S4.** Functional gene set enrichment analysis of the differentially expressed genes in MTX-resistant PCNSL-derived cells in molecular pathways. **(a-d)** GSEA of DEG for HKBML-MTX compared with HKBML in molecular pathways. **(a)** Formation of the ternary complex. **(b)** Cancer module 29. **(c)** Thymocyte vs naïve CD4 T cell. **(d)** Neutrophil vs B cell. **(e-g)** GSEA of DEG for TK-MTX compared with TK in molecular pathways. **(e)** Cancer module 29. **(f)** Thymocyte vs naïve CD4 T cell. **(g)** Th1 vs Th17.

# Suppl. Fig. S5

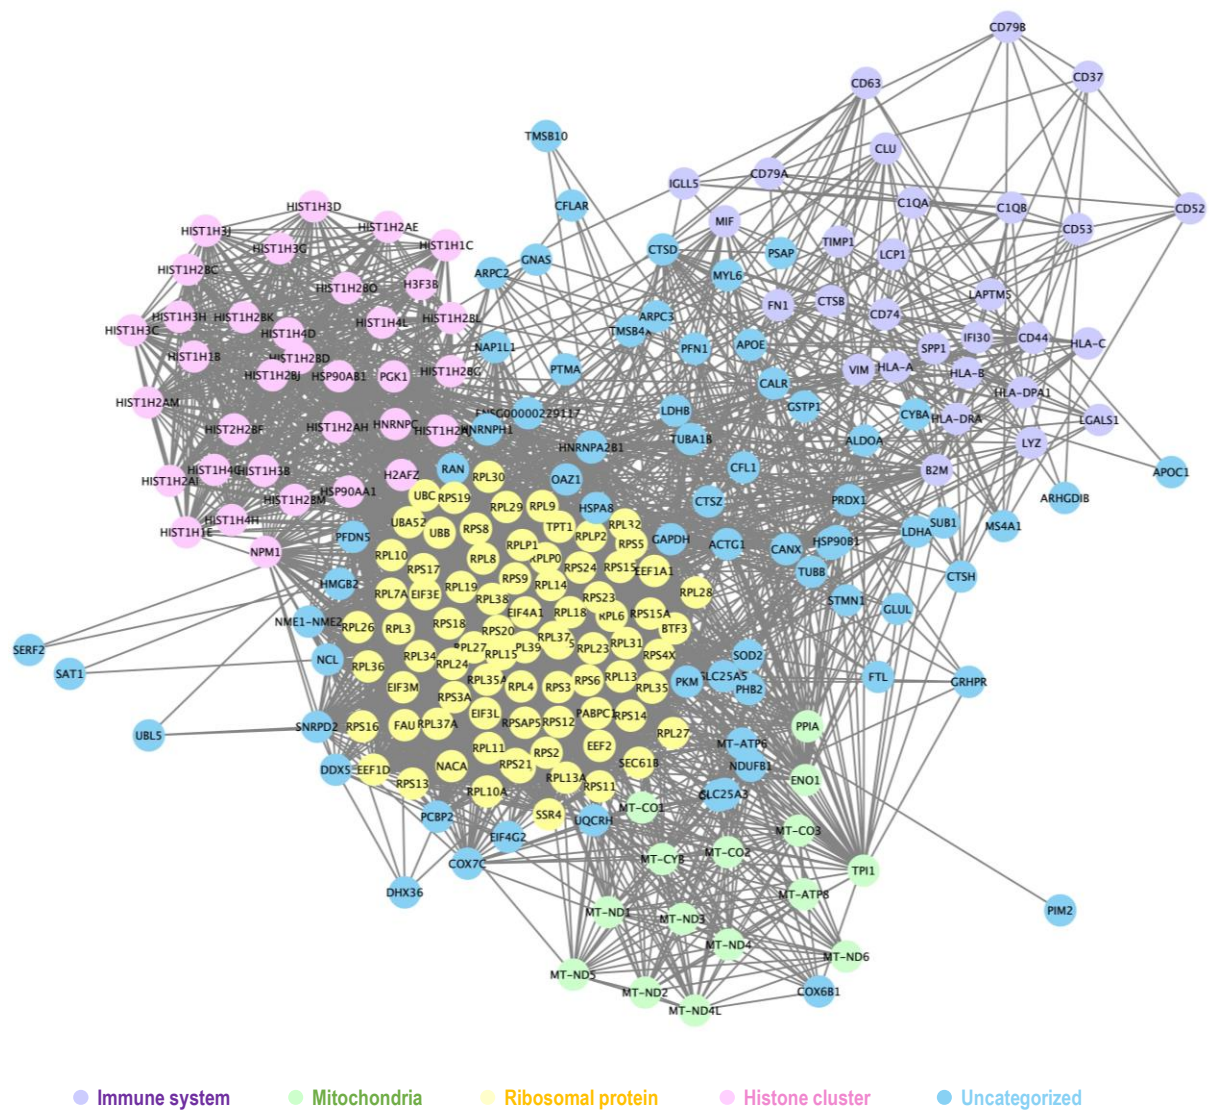

**Suppl. Fig. S5.** Protein-protein interaction (PPI) networks in PCNSL with poor prognoses. The networks were estimated by the MCODE with the STRING. PPI networks based on the upregulated genes in the PCNSL with poor prognoses, compared with the good prognoses.
